# Supplementary material
Source: PubMed Central journal article supplement (PMC4639926)
Supplement: NIHMS77636-supplement-02.pdf [file NIHMS77636-supplement-02.pdf]

**Supplementary Table 1. Effect of *gpr161* knockdown and RNA rescue on cardiac looping.**

|                                        | % normal D-looping | % abnormal no looping | % abnormal L-looping | total embryos |
|----------------------------------------|--------------------|-----------------------|----------------------|---------------|
| CTL                                    | 97.8               | 1.3                   | 0.9                  | 223           |
| <i>gpr161</i> -MO                      | 32.4               | 52.9                  | 14.7                 | 293           |
| <i>gpr161</i> -MO + <i>gpr161</i> -RNA | 52.2               | 33.8                  | 14.0                 | 157           |
