# Supplementary material
Source: PubMed Central journal article supplement (PMC4639926)
Supplement: NIHMS77636-supplement-03.pdf [file NIHMS77636-supplement-03.pdf]

**Supplementary Table 2. Effect of *gpr161* knockdown on *lefty2* expression on lateral plate mesoderm.**

|                       | % normal<br><i>lefty2</i> on left | % abnormal<br><i>lefty2</i> absent | % abnormal<br><i>lefty2</i><br>bilateral | % abnormal<br><i>lefty2</i> on<br>right | total<br>embryos |
|-----------------------|-----------------------------------|------------------------------------|------------------------------------------|-----------------------------------------|------------------|
| CTL                   | 99.3                              | 0.0                                | 0.7                                      | 0.0                                     | 301              |
| <i>gpr161</i> -<br>MO | 67.0                              | 31.6                               | 0.3                                      | 1.1                                     | 348              |
