# Supplementary material
Source: PubMed Central journal article supplement (PMC4639926)
Supplement: NIHMS77636-supplement-04.pdf [file NIHMS77636-supplement-04.pdf]

**Supplementary Table 3. Effect of *gpr161* knockdown on *spaw* expression on lateral plate mesoderm.**

| MO#               | % normal spaw on left | % abnormal spaw |           |       | total embryos |
|-------------------|-----------------------|-----------------|-----------|-------|---------------|
|                   |                       | absent          | bilateral | right |               |
| CTL               | 98.7                  | 0.6             | 0.6       | 0.0   | 311           |
| <i>gpr161</i> -MO | 63.4                  | 30.4            | 3.3       | 2.9   | 306           |
