# Supplementary material
Source: PubMed Central journal article supplement (PMC4639926)
Supplement: NIHMS77636-supplement-05.pdf [file NIHMS77636-supplement-05.pdf]

**Supplementary Table 4. Effect of *gpr161* knockdown on left-biased expression of *bmp4*.**

|                               | % normal <i>bmp4</i><br>left bias | % abnormal<br><i>bmp4</i> unbiased | total embryos |
|-------------------------------|-----------------------------------|------------------------------------|---------------|
| CTL<br>(23 hpf)               | 85.8                              | 14.2                               | 254           |
| <i>gpr161</i> -MO<br>(23 hpf) | 47.5                              | 52.5                               | 193           |
| CTL<br>(25 hpf)               | 99.5                              | 0.5                                | 141           |
| <i>gpr161</i> -MO<br>(25 hpf) | 56.9                              | 43.1                               | 102           |
