# Supplementary material
Source: PubMed Central journal article supplement (PMC4639926)
Supplement: NIHMS77636-supplement-12.pdf [file NIHMS77636-supplement-12.pdf]

**Supplementary Table 5. Effect of *gpr161* knockdown on visceral asymmetry marked by *foxa3*.**

|                                        | % normal LR visceral organs | % abnormal visceral organs at midline | % abnormal heterotaxia | total embryos |
|----------------------------------------|-----------------------------|---------------------------------------|------------------------|---------------|
| CTL                                    | 99.3                        | 0.0                                   | 0.7                    | 299           |
| <i>gpr161</i> -MO                      | 39.5                        | 49.1                                  | 11.4                   | 344           |
| <i>gpr161</i> -MO + <i>gpr161</i> -RNA | 63.5                        | 17.5                                  | 19.0                   | 200           |
