# Supplementary material
Source: PubMed Central journal article supplement (PMC4639926)
Supplement: NIHMS77636-supplement-13.pdf [file NIHMS77636-supplement-13.pdf]

**Supplementary Table 6. Effect of *gpr161* knockdown and rescued by *ncx1* and *pmca* RNA on cardiac looping.**

|                                      | % normal D-looping | % abnormal no looping | % abnormal L-looping | total embryos |
|--------------------------------------|--------------------|-----------------------|----------------------|---------------|
| CTL                                  | 98.0               | 2.0                   | 0.0                  | 349           |
| <i>gpr161</i> -MO                    | 45.9               | 50.6                  | 3.5                  | 368           |
| <i>gpr161</i> -MO + <i>ncx</i> -RNA  | 66.0               | 27.1                  | 6.9                  | 144           |
| <i>gpr161</i> -MO + <i>pmca</i> -RNA | 68.1               | 26.5                  | 5.5                  | 238           |
